# Supplementary material for: Comparison between hydroxyapatite and polycaprolactone in inducing osteogenic differentiation and augmenting maxillary bone regeneration in rats
Source: PeerJ. 2022 May 2;10:e13356. doi: 10.7717/peerj.13356 (PMC9070322; doi:10.7717/peerj.13356)
Supplement: Supplemental Information 3 — In vitro cell viability analysis using MTT assay as well as ALP specific activity using ALP assay. In vivo analysis comprising micro-CT and hematoxylin, eosin, and immunoreactive score (IRS) analyses are also shown. [file peerj-10-13356-s003.xlsx]

## Sheet: MTT
MTT Analysis (number of viable cells x104)
No.	Day 0			Day 7			Day 14			Day 21
	MC3T3-E1 (2D)	MC3T3-E1 + HA	MC3T3-E1 + PCL	MC3T3-E1 (2D)	MC3T3-E1 + HA	MC3T3-E1 + PCL	MC3T3-E1 (2D)	MC3T3-E1 + HA	MC3T3-E1 + PCL	MC3T3-E1 (2D)	MC3T3-E1 + HA	MC3T3-E1 + PCL
1	6.07407	7.87393	8.78902	8.7246	19.9303	13.7304	21.2231	25.6289	16.9334	22.3422	18.5212	15.5676
2	6.06854	11.3674	8.86983	7.8271	20.6768	11.9023	21.8294	23.3028	18.9127	24.0171	19.1735	17.8838
3	7.09264	9.0239	8.76221	10.6291	22.9729	15.6273	22.2371	21.5267	15.8892	22.1598	16.2863	16.5734
4	6.11501	8.89192	7.48669	9.7239	18.9976	14.5185	22.3993	19.1778	19.4683	23.8202	17.0827	14.9965
5	6.04345	6.40775	6.08504	7.5998	19.9858	12.9402	20.9283	23.4194	13.5198	22.1102	21.7024	12.2904
Average	6.27874	8.71298	7.99856	8.9009	20.5127	13.7438	21.7234	22.6111	16.9447	22.8899	18.5532	15.4623
STD	0.455707	1.81609	1.21354	1.27877	1.49933	1.43046	0.635305	2.40844	2.40236	0.945647	2.09786	2.0849
Increment of cells viable number
	HA vs 2D	PCL vs 2D	HA vs PCL
Day 0	1.36038	0.757828	0.602555
Day 7	0.220557	0.151687	0.0688699
Day 14	1.77313	1.76706	0.00607372
Day 21	1.15221	1.13925	0.0129573

## Sheet: ALP
ALP Specific Activity Analysis (U/mg)
No.	Day 0			Day 7			Day 14			Day 21
	MC3T3-E1 (2D)	MC3T3-E1 + HA	MC3T3-E1 + PCL	MC3T3-E1 (2D)	MC3T3-E1 + HA	MC3T3-E1 + PCL	MC3T3-E1 (2D)	MC3T3-E1 + HA	MC3T3-E1 + PCL	MC3T3-E1 (2D)	MC3T3-E1 + HA	MC3T3-E1 + PCL
1	0.01782	0.05926	0.05368	0.05453	0.13178	0.22251	0.11359	0.219401	0.19759	0.13567	0.28319	0.27589
2	0.01346	0.05876	0.04849	0.05515	0.133321	0.20421	0.11362	0.27841	0.27291	0.13826	0.34085	0.29953
3	0.01478	0.06309	0.06072	0.04892	0.169479	0.14654	0.120092	0.199293	0.23493	0.13619	0.32937	0.25796
4	0.01661	0.05873	0.08204	0.05567	0.17235	0.16909	0.11029	0.268199	0.1863	0.129986	0.30836	0.29345
5	0.01629	0.08793	0.06427	0.05861	0.145653	0.18989	0.12017	0.27221	0.21458	0.13173	0.31803	0.222498
Average	0.015792	0.065554	0.06184	0.054576	0.150517	0.186448	0.115552	0.247503	0.221262	0.134367	0.31596	0.269866
STD	0.00169501	0.0126402	0.0128453	0.00352817	0.0194079	0.0296722	0.00439341	0.0357349	0.0342114	0.00340307	0.0219958	0.0310561
Fold increase (vs day 0)	0	0	0	2.45593	1.29607	2.01501	6.31715	2.77555	2.57798	7.50856	3.81984	3.36393
						1.92233			3.89023			4.89745
Fold increase within group
Day 0	Day 0	Day 7	Day 14	Day 21
HA/2D	4.15109	2.75793	2.14191	2.35147
PCL/2D	3.91591	3.4163	1.91482	2.00842
HA/PCL	1.06006	1.23872	1.1186	1.17081

## Sheet: Micro-CT
Morphometric Analysis (Micro-CT)
Percentage of new bone volume (BV/TV, %)						New bone surface (mm2)						New bone surface density (1/mm)
No	HA (Control)	PCL (Control)	MC3T3-E1 + HA	MC3T3-E1 + PCL		No	HA (Control)	PCL (Control)	MC3T3-E1 + HA	MC3T3-E1 + PCL		No	HA (Control)	PCL (Control)	MC3T3-E1 + HA	MC3T3-E1 + PCL
1	2.415	2.2964	49.588	1.938		1	1.2645	5.2195	36.876	3.0484		1	2.1347	0.94394	9.3764	1.1136
2	1.2498	2.6223	77.499	3.2498		2	1.9938	4.3296	22.836	6.694		2	1.3148	1.0859	11.149	1.2774
3	47.043	1.3517	25.267	14.062		3	5.6542	3.5312	8.7662	48.592		3	10.478	0.62027	6.4833	2.9018
4	13.527	3.0219	23.299	6.1727		4	51.122	8.3608	14.475	12.115		4	3.006	0.97135	5.9111	2.0266
5	7.9611	0.96824	59.459	4.1324		5	18.531	2.3101	35.95	9.7179		5	2.4195	0.58142	10.013	1.0873
6	4.6032	3.062	21.327	3.0384		6	9.9028	4.7146	15.318	4.7182		6	1.3628	1.2003	4.554	1.70379
Average	12.7998	2.22042	42.7398	5.43222		Average	14.7447	4.7443	22.3702	14.1476		Average	3.45263	0.90053	7.91447	1.68508
Std Deviation	17.3492	0.876417	23.136	4.45901		Std Deviation	18.9105	2.04327	11.7659	17.192		Std Deviation	3.50135	0.2496	2.62136	0.699647
Std Error	7.08277	0.357796	9.44525	1.82038		Std Error	7.72016	0.83416	4.80341	7.01862		Std Error	1.42942	0.101899	1.07017	0.28563

## Sheet: Scoring H&E
Scoring H&E staining
No	HA (Control)	PCL (Control)	MC3T3-E1 + HA	MC3T3-E1 + PCL
1	4	1	2	1
2	0	0	3	2
3	4	2	1	4
4	1	4	4	4
5	1	1	3	3
6	2	3	2	4
Average	2	1.83333	2.5	3
Std Deviation	1.67332	1.47196	1.04881	1.26491
Std Error	0.68313	0.600925	0.428174	0.516398
Fold increase
HA/PCL	1.09091
MC3T3-E1+HA/HA	1.25
MC3T3-E1+PCL/PCL	1.63636

## Sheet: IRS
Immunoreactive Score (IRS)
IHC Percentage of Positive Cells (ALP)						Score for % of Positive Cells (ALP)						Intensity of Staining (ALP)
	Group						Group						Group
	Empty HA	MC3T3-E1-HA	Empty PCL	MC3T3-E1-PCL			Empty HA	MC3T3-E1-HA	Empty PCL	MC3T3-E1-PCL			Empty HA	MC3T3-E1-HA	Empty PCL	MC3T3-E1-PCL
N1	27.294	14.004	16.889	26.242		N1	2	2	2	2		N1	1	3	1	2
N2	19.467	22.3	17.073	24.061		N2	2	2	2	2		N2	2	3	2	3
N3	15.899	22.756	17.303	34.34		N3	2	2	2	2		N3	1	3	2	3
N4	22.74	24.264	21.349	22.614		N4	2	2	2	2		N4	2	2	2	3
N5	24.57	25.379	19.768	32.12		N5	2	2	2	2		N5	2	3	2	3
N6	18.595	26.304	9.976	29.03		N6	2	2	2	2		N6	1	2	3	3
Average	21.4275	22.5012	17.0597	28.0678		Average	2	2	2	2		Average	1.5	2.66667	2	2.83333
Std Deviation	4.20582	4.43076	3.89873	4.6004
IRS (ALP)
	Group
	Empty HA	MC3T3-E1-HA	Empty PCL	MC3T3-E1-PCL
N1	2	6	2	4
N2	4	6	4	6
N3	2	6	4	6
N4	4	6	4	6
N5	4	6	4	6
N6	2	6	3	6
Average	3	6	3.5	5.66667
Std Deviation	1.09545	0	0.83666	0.816497
IHC Percentage of Positive Cells (OCN)						Score for % of Positive Cells (OCN)						Intensity of Staining (OCN)
	Group						Group						Group
	Empty HA	MC3T3-E1-HA	Empty PCL	MC3T3-E1-PCL			Empty HA	MC3T3-E1-HA	Empty PCL	MC3T3-E1-PCL			Empty HA	MC3T3-E1-HA	Empty PCL	MC3T3-E1-PCL
N1	40.566	34.238	31.339	38.12		N1	2	2	2	2		N1	2	3	3	3
N2	38.335	35.871	27.516	33.358		N2	2	2	2	2		N2	2	3	2.5	2.5
N3	34.343	41.321	22.377	36.031		N3	2	2	2	2		N3	2	3	3	3
N4	33.513	34.246	22.527	33.173		N4	2	2	2	2		N4	3	3	3	3
N5	36.564	41.477	31.666	36.478		N5	2	2	2	2		N5	3	3	3	3
N6	34.905	32.261	31.182	34.948		N6	2	2	2	2		N6	2	3	3	3
Average	36.371	36.569	27.7678	35.3513		Average	2	2	2	2		Average	2.33333	3	2.91667	2.91667
Std Deviation	2.6804	3.9127	4.38626	1.91196
IRS (OCN)
	Group
	Empty HA	MC3T3-E1-HA	Empty PCL	MC3T3-E1-PCL
N1	4	6	4	6
N2	4	6	5	5
N3	4	6	4	6
N4	6	6	4	6
N5	6	6	5	6
N6	4	6	4	6
Average	4.66667	6	4.33333	5.83333
Std Deviation	1.0328	0	0.516398	0.408248
